# Supplementary material for: Exogenous Liposomal Ceramide-C6 Ameliorates Lipidomic Profile, Energy Homeostasis, and Anti-Oxidant Systems in NASH
Source: PubMed Central journal article supplement (PMC7290333; doi:10.3390/cells9051237), 2020-05-16
Supplement: cells-09-01237-s001.pdf [file cells-09-01237-s001.pdf]

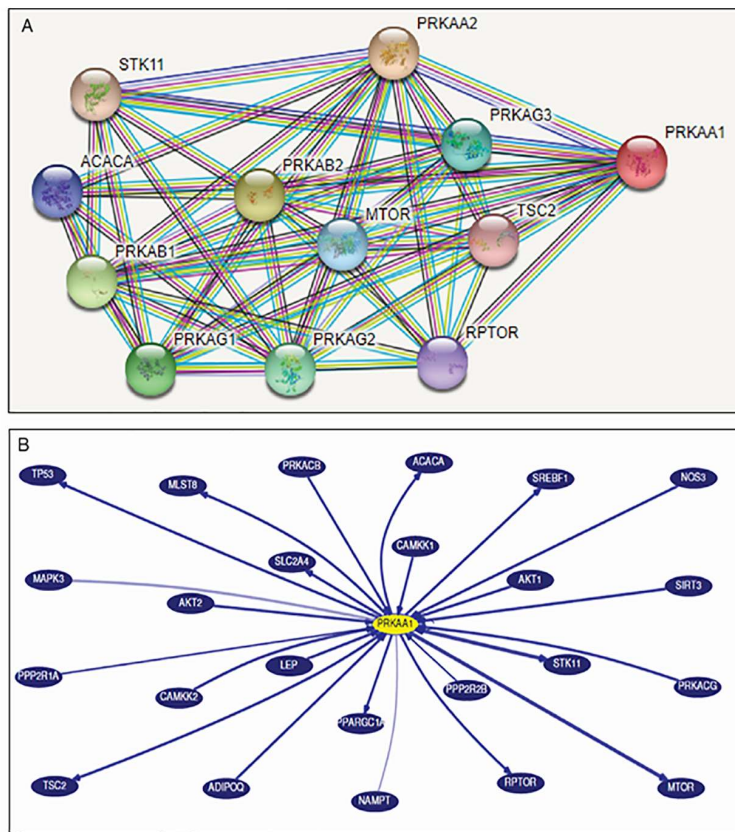

**Figure S1:** Overview of AMPK specific STRING analysis and UCSC Genome Browser datamining. (A) A list of AMPK closely related genes was generated by means of STRING analysis (<http://string-db.org>) and STRING analysis was performed, network edge evidence based and highest confidence (0.900) with no more than 10 interactors and (B) UCSC Genome Browser datamining (<https://genome.ucsc.edu/goldenPath>).

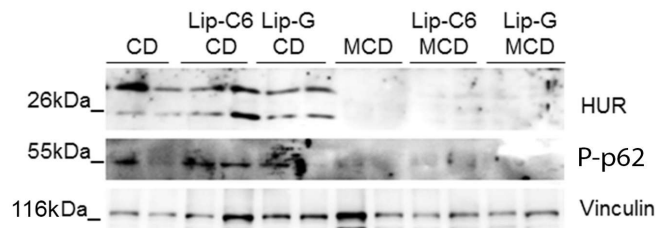

**Figure S2.** Lip-C6 treatment in MCD-fed mice enhances the endogenous anti-oxidative stress-signaling pathway without inducing apoptosis. Western blot analysis demonstrated that both expression of the p62 phosphorylation and the mRNA stabilizing protein HuR/ELAV1, known as apoptosis marker, were absent in MCD-fed mice with or without Lip-C6 treatment indicating that the Lip-C6 treatment does not induce KEAP1/p62 - related apoptosis (n=2 samples for each condition).

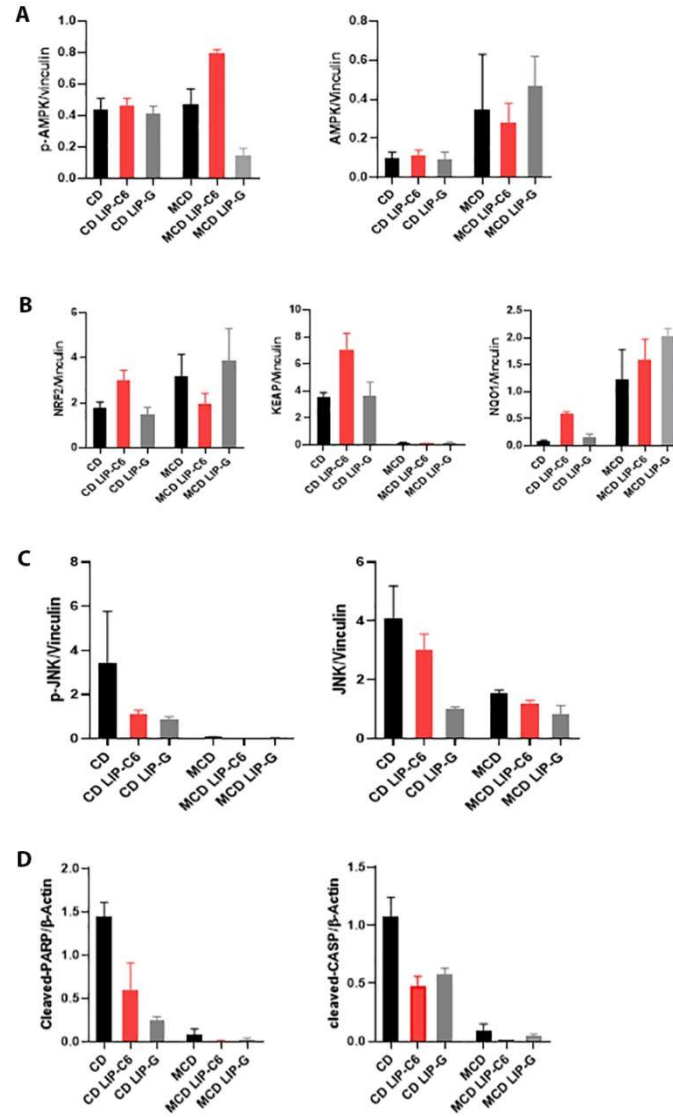

**Figure S3.** semi-quantitative densitometric values of all proteins were normalized for phosphorylated versus total protein and/or to  $\beta$ -actin or Tubulin. Densitometry analysis was performed by employing Fiji ImageJ and GraphPad Prism was used for Standard Error (SE). Graphs represent averages  $\pm$  SE of 2 samples of each conditions investigated.

**Table S1.** Primary and secondary antibodies used in this study.

| antibody                                | Catalogue number | Company                   |
|-----------------------------------------|------------------|---------------------------|
| Cleaved PARP (D214) mouse specific      | 9544S            | Cell Signaling technology |
| $\beta$ -actin                          | A5441            | Sigma-Aldrich             |
| Cleaved Caspase 3 (D175)                | 9661S            | Cell Signaling technology |
| Phospho-SAPK/JNK(Thr183/tyr185) (81E11) | 4668S            | Cell Signaling technology |
| SAPK/JNK(56G8)                          | 9258S            | Cell Signaling technology |
| Vinculin (clone hVIN-1 ascites fluid)   | V9131            | Sigma-Aldrich             |
| Keap1                                   | ab66620          | Abcam                     |
| Actin (20-30)                           | A5060            | Sigma-Aldrich             |
| Nrf2                                    | ab31163          | Abcam                     |
| NQO1                                    | ab2346           | Abcam                     |
| HuR (H-280)                             | sc-20694         | Santa Cruz Biotechnology  |
| PhosphoSQSTM1/p62(Thr269/Ser272)        | 13121S           | Cell Signaling technology |
| SQSTM1/p62                              | 5114S            | Cell Signaling technology |
| Phospho-AMPK $\alpha$ (Thr172) (40H9)   | 2535S            | Cell Signaling technology |

|                                         |          |                           |
|-----------------------------------------|----------|---------------------------|
| AMPK $\alpha$                           | 2532S    | Cell Signaling technology |
| Donkey anti-goat IgG-HRP                | sc-2020  | Santa Cruz Biotechnology  |
| Goat anti-mouse IgG-HRP                 | sc-2055  | Santa Cruz Biotechnology  |
| Goat anti-rabbit IgG-HRP                | sc-2054  | Santa Cruz Biotechnology  |
| Goat anti-rabbit IgG pre-adsorbed (HRP) | GTX85336 | GeneTex                   |

**Table S2.** qRT-PCR Assays-on-demand used in this study (Applied Biosystems).

| Gene                                     | Abbreviation   | Cat. N. (Company) |
|------------------------------------------|----------------|-------------------|
| CC chemokine ligand 2                    | CCL2           | Mm00441242_m1     |
| cluster of differentiation molecule 11B  | CD11B/Itgam    | Mm00434455_m1     |
| nuclear factor kappa B                   | NF- $\kappa$ B | Mm00476361_m1     |
| tumor necrosis factor $\alpha$           | TNF $\alpha$   | Mm00443258_m1     |
| Glyceraldehyde 3-phosphate dehydrogenase | GAPDH          | Mm03302249_g1     |

**Table S3.** Baseline characteristics of patients and controls at the time of liver biopsy. WBC: white blood count; AST: aspartate aminotransferase; ALT: alanine aminotransferase; GGT: gamma-glutamyl transpeptidase; ALP: alkaline phosphatase.

|                                      | Normal livers<br>n=10 | NAFLD<br>n=9     |
|--------------------------------------|-----------------------|------------------|
| <b>Demographics</b>                  |                       |                  |
| Age - median (IQR)                   | 32(29-49)             | 49.5 (43-53)     |
| Gender - male n (%)                  | 7(70)                 | 2(22.2)          |
| <b>Lab parameters - median (IQR)</b> |                       |                  |
| Hemoglobin g/dL                      | 14.6(13.2-15.3)       | 14.3(12.4-14.9)  |
| WBC x10 <sup>9</sup> /L              | 5.7(5.1-7.2)          | 8.13(6.9-10.1)   |
| Platelets x 10 <sup>9</sup> /L       | 237(217-267.5)        | 262(221.5-361.5) |
| AST (U/L)                            | 21.5(19.2-25.8)       | 30(25-36.5)      |
| ALT (U/L)                            | 25(16.8-31.2)         | 40(31-49.5)      |
| Bilirubin mg/dL                      | 0.6(0.5-0.7)          | 0.6(0.4-0.88)    |
| GGT (U/L)                            | 17(14.0-23.2)         | 27(19-31)        |
| ALP (U/L)                            | 147(112.5-184.8)      | 182(170-195)     |
| Albumin (g/dL)                       | 4.6(4.4-4.6)          | 4.5(4.4-4.6)     |
| Creatinine mg/dL                     | 0.84(0.76-0.89)       | 1.05(0.84-1.1)   |
| Sodium (mEq/L)                       | 140(138.7-141.5)      | 140(136.5-142.5) |
